# Supplementary material for: Order-disorder transitions of cytoplasmic N-termini in the mechanisms of P-type ATPases
Source: Royal Society of Chemistry journal article supplement (doi:10.1039/d0fd00040j), 2020-09-02
Supplement: d0fd00040j1.pdf [file d0fd00040j1.pdf]

**Supplementary information;**

**Peptide synthesis;** N-terminus of the  $\alpha$ -subunit of pig kidney  $\text{Na}^+, \text{K}^+$ -ATPase 1-40: GRDKYEPAAVSEHGDKKKAKKERDMDELKKEYSMDDHKLS (N-NKA), residues underlined have been double coupled, with histidine also being coupled at a reduced temperature of 50°C. N-terminus of the  $\alpha$ -subunit of gastric  $\text{H}^+, \text{K}^+$ -ATPase 1-40 from *Siniperca chuatsi* (Chinese mandarin fish): SKQDTYDMFEMGGEMDKKKKKKKMK KKEKLEGMKKEMDID (N-HKA), single coupling for all residues. Both syntheses were initiated at 100  $\mu\text{mol}$  scale then reduced to 50  $\mu\text{mol}$  at residue number 20, and for both syntheses the deprotection solution contained 0.1 M HOBT to minimise aspartamide formation. Other synthesis specifications are as per the manufacturer's recommendation.

**Purity, identity and yield;** The purity of the peptides as assessed by UPLC was  $\geq 95\%$ . Yields for the pure peptides were:  $\text{Na}^+, \text{K}^+$ -ATPase 1-40, 7.4 mg, (yield 3.2%) and for the  $\text{H}^+, \text{K}^+$ -ATPase 21-40, 8.2 mg, (yield 3.4%).  $\text{Na}^+, \text{K}^+$ -ATPase 1-40;  $[\text{M}+1\text{H}]^{1+}$  mass estimate based on the  $[\text{M}+4\text{H}]^{4+}$  ion species (1158.3) is 4630.2 (calculated mass 4631.2),  $\text{H}^+, \text{K}^+$ -ATPase 1-40;  $[\text{M}+1\text{H}]^{1+}$  mass estimate based on the  $[\text{M}+4\text{H}]^{4+}$  ion species (1212.1) is 4845.5 Da (calculated mass 4845.8 Da).

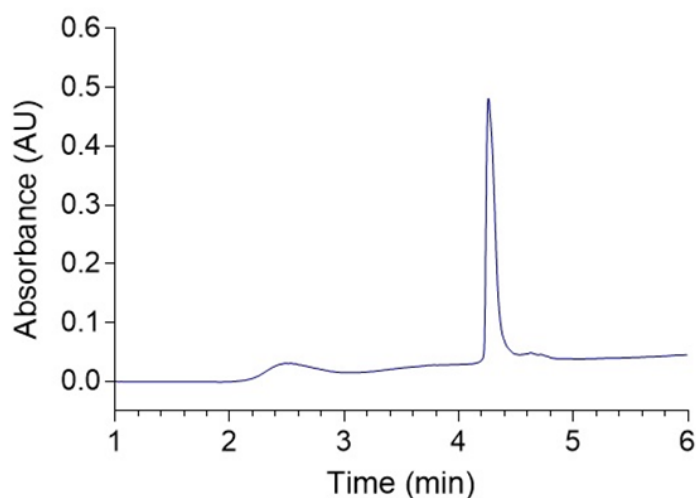

**Figure S1.** Analytical RP-HPLC trace from the final purified pool of  $\alpha$ -subunit of gastric  $\text{H}^+, \text{K}^+$ -ATPase 1-40 from *Siniperca chuatsi*.  $R_t$  4.3 min (0-50% B over 5 min,  $\lambda = 230$  nm).

| m/z ratio | relative intensity (%) | ion species assignment |
|-----------|------------------------|------------------------|
| 1615.6    | 26.4                   | $[M+3H]^{3+}$          |
| 1212.1    | 53.8                   | $[M+4H]^{4+}$          |
| 969.5     | 67.9                   | $[M+5H]^{5+}$          |
| 808.4     | 100.0                  | $[M+6H]^{6+}$          |
| 693.1     | 100.0                  | $[M+7H]^{7+}$          |
| 606.6     | 28.3                   | $[M+8H]^{8+}$          |
| 539.3     | 18.9                   | $[M+9H]^{9+}$          |

**Table 1.** ESI-MS data for the final pool of  $\alpha$ -subunit of gastric  $H^+,K^+$ -ATPase 1-40 from *Siniperca chuatsi*.

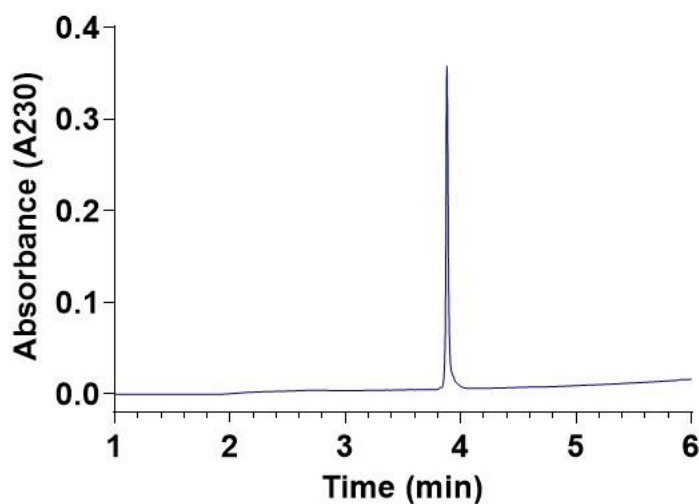

**Figure S2.** Analytical RP-HPLC trace of the final purified pool of  $\alpha$ -subunit of pig kidney  $Na^+,K^+$ -ATPase 1-40.  $R_t$  3.9 min (0-50% B over 5 min,  $\lambda = 230$  nm).

| m/z ratio | relative intensity (%) | ion species assignment |
|-----------|------------------------|------------------------|
| 1543.9    | 26.7                   | $[M+3H]^{3+}$          |
| 1158.3    | 46.7                   | $[M+4H]^{4+}$          |
| 926.5     | 66.7                   | $[M+5H]^{5+}$          |
| 772.5     | 100.0                  | $[M+6H]^{6+}$          |
| 662.5     | 100.0                  | $[M+7H]^{7+}$          |
| 579.7     | 83.3                   | $[M+8H]^{8+}$          |
| 515.4     | 46.7                   | $[M+9H]^{9+}$          |

**Table S2.** ESI-MS data for the final pool of  $\alpha$ -subunit of pig kidney  $Na^+,K^+$ -ATPase 1-40.

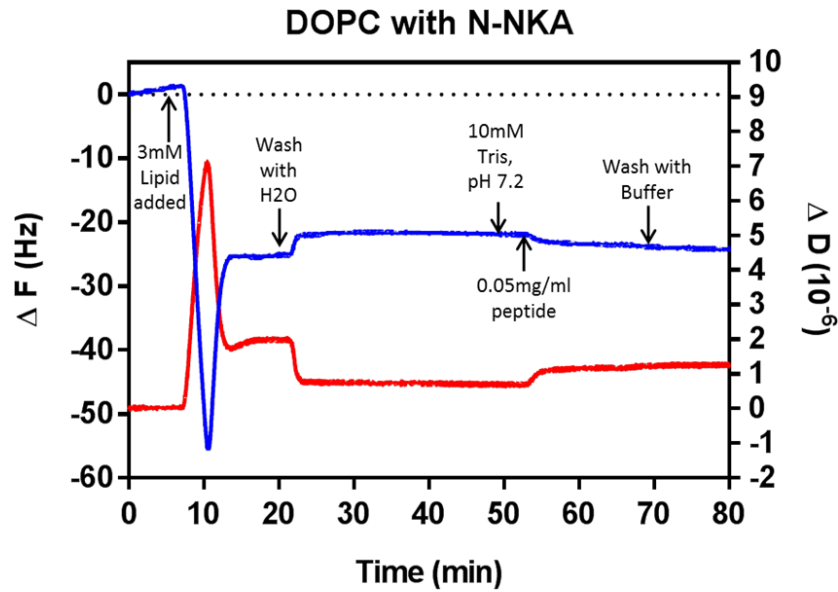

**Figure S3.** Characteristic QCM-D data set depicting SLB formation and peptide interaction. An SLB consisting of DOPC was formed on a silicon dioxide-coated surface of a quartz crystal from a suspension of liposomes. In this experiment, N-NKA was added to the SLB and the corresponding changes to the frequency ( $\Delta f$ , blue line) and dissipation ( $\Delta D$ , red line) were measured. This plot demonstrates the maintenance of a stable SLB over a period of 80 mins despite changes in buffers and shows the interaction of N-NKA with the SLB. The peptides were dissolved in 10 mM Tris, 0.3 mM EDTA, pH 7.2 buffer at a final concentration of 50  $\mu\text{g}/\text{ml}$ . Measurements were performed at 24 °C.
